# Supplementary material for: Umbilical cord blood androgen levels and ASD-related phenotypes at 12 and 36 months in an enriched risk cohort study
Source: PubMed Central journal article supplement (PMC5282802; doi:10.1186/s13229-017-0118-z), 2017-01-31
Supplement: 13229_2017_118_MOESM1_ESM.pdf [file 13229_2017_118_MOESM1_ESM.pdf]

Figure S1. Scatterplot between ln transformed umbilical cord testosterone (T), androstenedione (A4) and dehydroepiandrosterone (DHEA) level by infant sex.

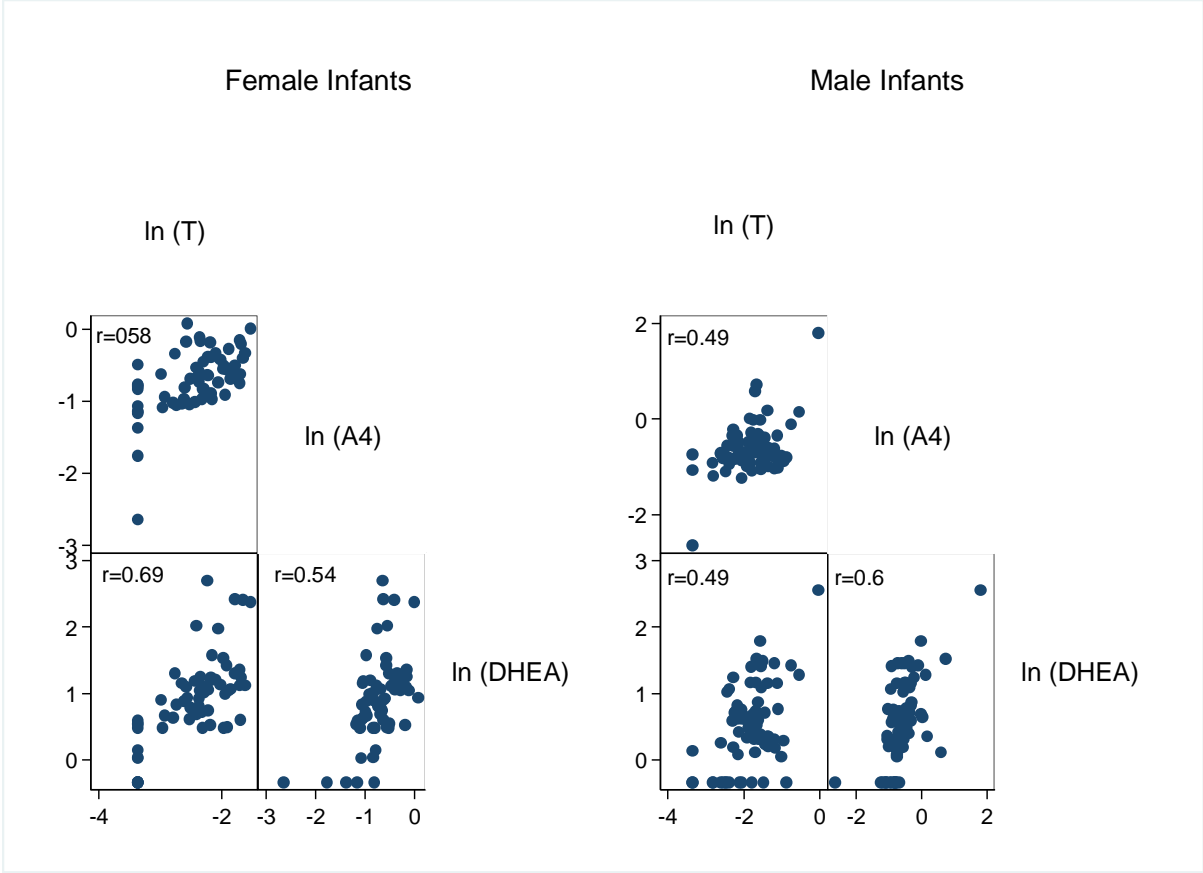

ln= natural log transformed; n=137 with Pearson's r, all with P value <0.001

Figure S2. Scatterplot between ln transformed umbilical cord androstenedione level and total AOSI score by infant sex.

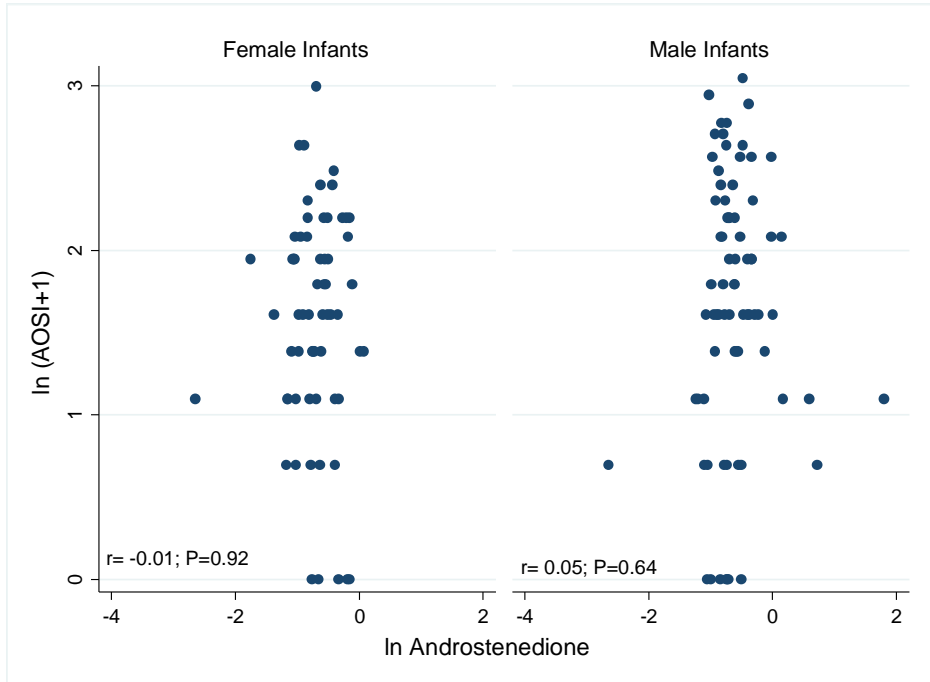

ln= natural log transformed; n=137 with Pearson's r and P value

Figure S3. Scatterplot between ln transformed umbilical cord dehydroepiandrosterone (DHEA) level and total AOSI score by infant sex.

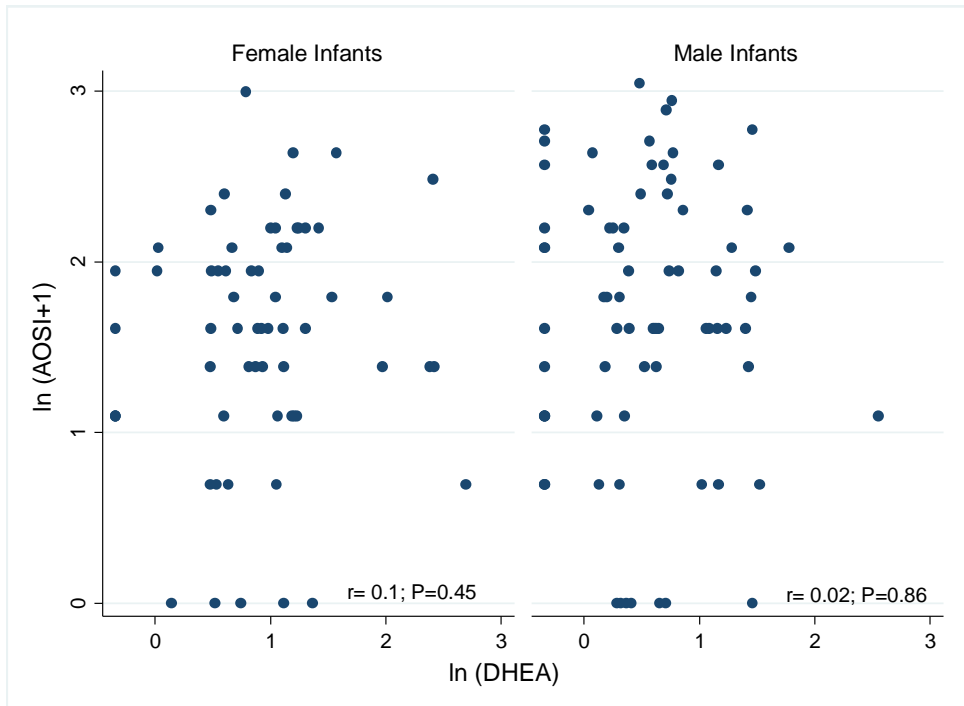

ln= natural log transformed; n=137 with Pearson's r and P value

Figure S4. Scatterplot between ln transformed umbilical cord androstenedione level and total SRS raw score by infant sex.

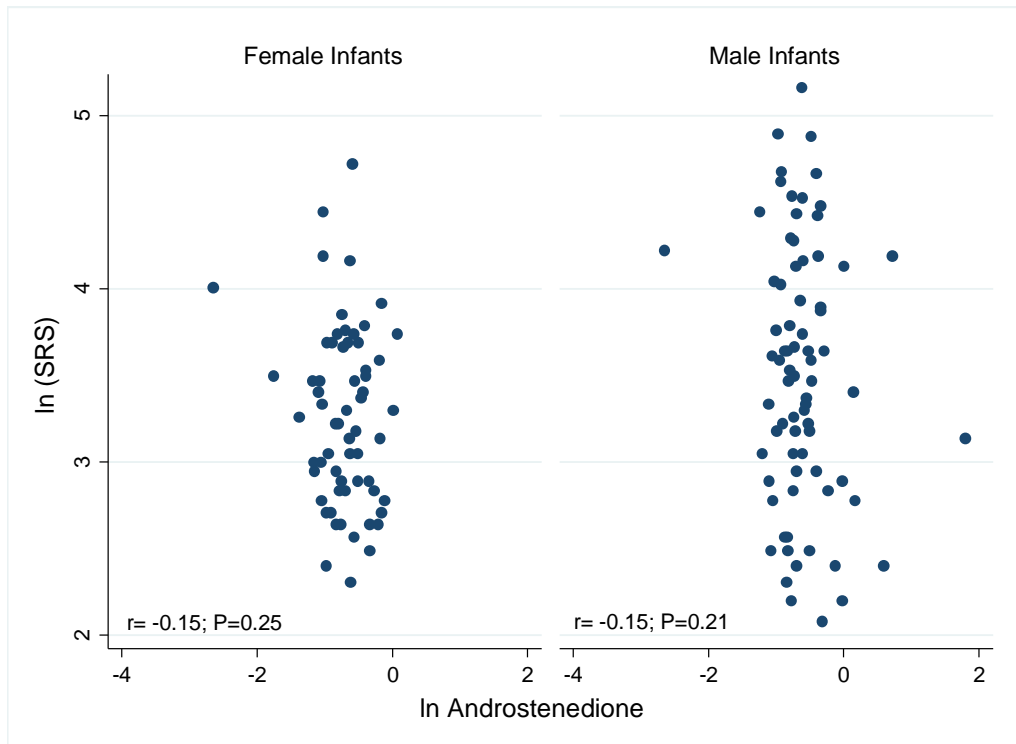

ln= natural log transformed; n=137 with Pearson's r and P value

Figure S5. Scatterplot between ln transformed umbilical cord dehydroepiandrosterone (DHEA) level and total SRS raw score by infant sex.

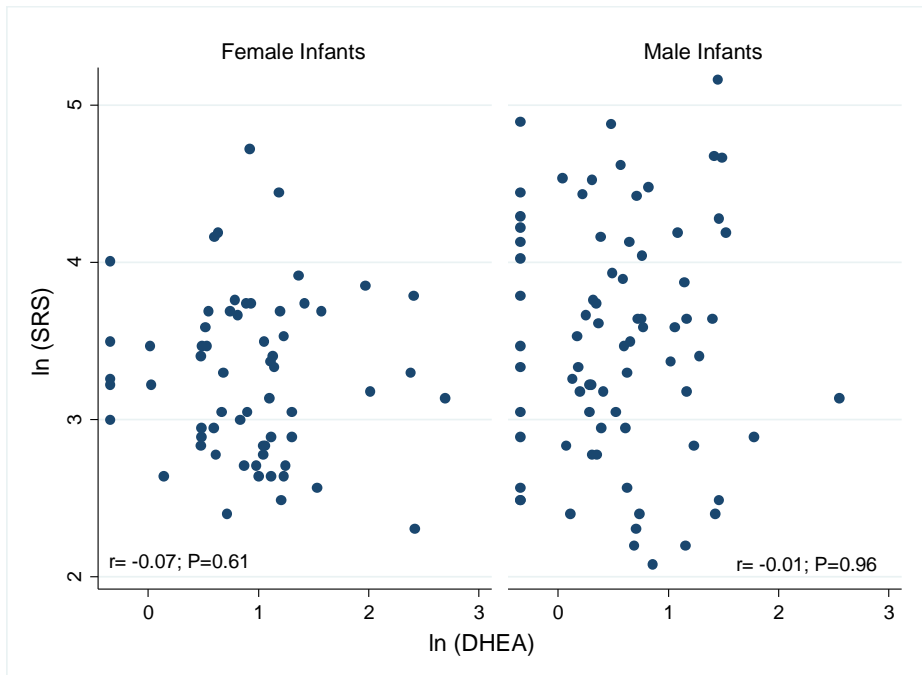

ln= natural log transformed; n=137 with Pearson's r and P value

Figure S6. Scatterplot between ln-transformed umbilical cord androstenedione (A4) level and total AOSI score by the older affected sibling's sex.

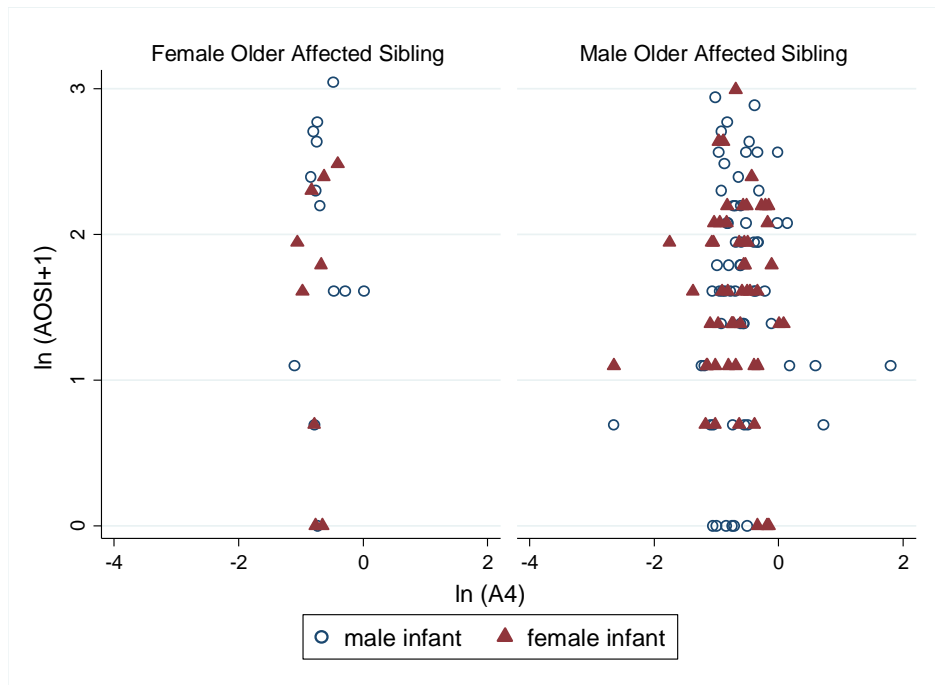

ln= natural log transformed; n=137, female older affected sibling=22, male older affected sibling=115

Figure S7. Scatterplot between ln-transformed umbilical cord androstenedione (A4) level and total SRS score by the older affected sibling's sex.

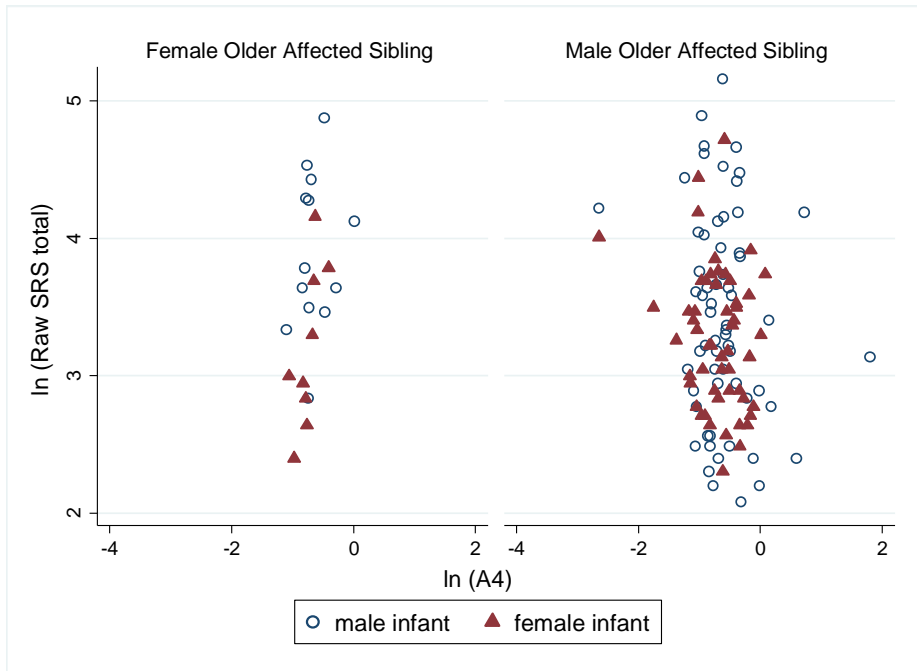

ln= natural log transformed; n=137, female older affected sibling=22, male older affected sibling=115

Figure S8. Scatterplot between ln-transformed umbilical cord dehydroepiandrosterone (DHEA) level and total AOSI score by the older affected sibling's sex.

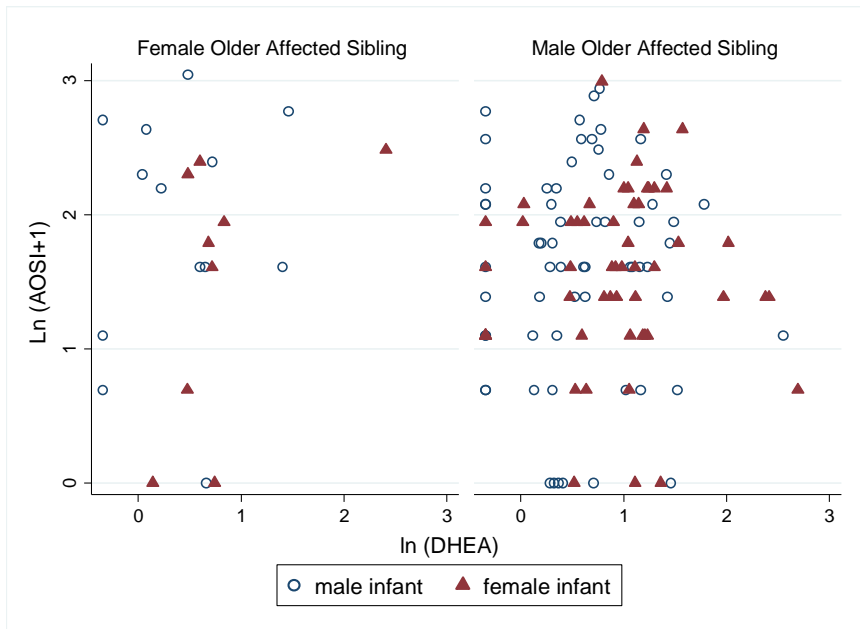

ln= natural log transformed; n=137, female older affected sibling=22, male older affected sibling=115

Figure S9. Scatterplot between ln-transformed umbilical cord dehydroepiandrosterone (DHEA) level and total SRS raw score by the older affected sibling's sex.

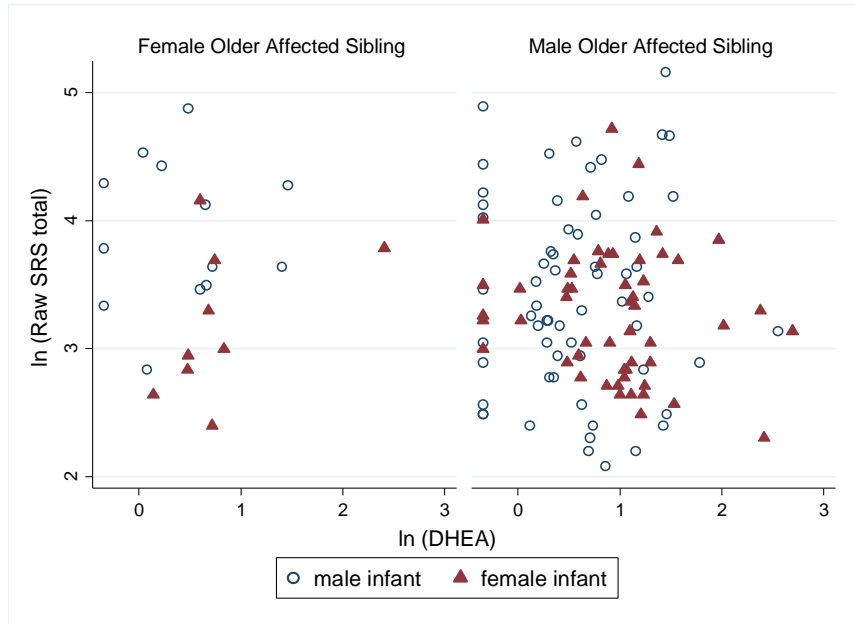

ln= natural log transformed; n=137, female older affected sibling=22, male older affected sibling=115

Table S1. Study characteristics comparison across two outcome measures.

| Characteristics             | AOSI only<br>(n=175) |      | SRS only<br>(n=140) |      | P    |
|-----------------------------|----------------------|------|---------------------|------|------|
|                             | Mean                 | SD   | Mean                | SD   |      |
| Maternal age                | 33.8                 | 4.5  | 34.7                | 4.7  | 0.08 |
| Gestational age at delivery | 39.4                 | 1.6  | 39.2                | 1.9  | 0.31 |
| Total AOSI score*           | 5.26                 | 4.3  |                     |      |      |
| Total SRS Raw score*        |                      |      | 28.8                | 1.96 |      |
| ln (Testosterone)*          | 0.43                 | 1.94 | 0.42                | 1.93 | 0.94 |
| ln (Androstenedione)*       | 1.81                 | 1.59 | 1.80                | 1.62 | 0.96 |
| ln (DHEA)*                  | 6.93                 | 1.98 | 7.10                | 1.95 | 0.45 |
|                             | %                    | n    | %                   | n    |      |
| Maternal Race               |                      | 175  |                     | 140  |      |
| Asian                       | 11.2                 |      | 10.8                |      | 0.96 |
| Black                       | 9.5                  |      | 8.6                 |      |      |
| Other                       | 8.3                  |      | 8.3                 |      |      |
| White                       | 64.5                 |      | 64.2                |      |      |
| Unknown                     | 5.9                  |      | 7.9                 |      |      |
| Maternal Hispanic/Latino    | 17.5                 | 168  | 19.3                | 138  | 0.27 |
| Older male affected sibling | 85.1                 | 175  | 83.6                | 140  | 0.72 |
| Male infants                | 54.3                 | 175  | 53.6                | 140  | 0.94 |

\* Geometric mean and geometric sd is presented.

ln= natural log transformed.

Table S2. Total and infant sex stratified adjusted models of androgen levels with 12- and 36-month outcomes.

| Androgens* | Subject Sex | Outcomes                              |              |          |                            |                                      |              |          |                            |
|------------|-------------|---------------------------------------|--------------|----------|----------------------------|--------------------------------------|--------------|----------|----------------------------|
|            |             | 12 month AOSI<br>(Female=80, Male=95) |              |          |                            | 36 month SRS<br>(Female=65, Male=75) |              |          |                            |
|            |             | beta                                  | 95% CI       | <i>P</i> | Interaction<br><i>P</i> ** | beta                                 | 95% CI       | <i>P</i> | Interaction<br><i>P</i> ** |
| ln(T)      | Female      | 0.20                                  | (-0.10,0.50) | 0.19     | 0.99                       | -0.06                                | (-0.30,0.18) | 0.64     | 0.36                       |
|            | Male        | 0.21                                  | (-0.08,0.51) | 0.16     |                            | 0.14                                 | (-0.19,0.46) | 0.41     |                            |
| ln(A4)     | Female      | 0.13                                  | (-0.31,0.56) | 0.55     | 0.81                       | -0.20                                | (-0.53,0.13) | 0.23     | 0.87                       |
|            | Male        | 0.15                                  | (-0.20,0.50) | 0.38     |                            | -0.17                                | (-0.55,0.20) | 0.36     |                            |
| ln(DHEA)   | Female      | 0.1                                   | (-0.17,0.37) | 0.47     | 0.77                       | -0.04                                | (-0.24,0.16) | 0.71     | 0.83                       |
|            | Male        | 0.07                                  | (-0.18,0.31) | 0.58     |                            | -0.01                                | (-0.31,0.31) | 0.98     |                            |

\*Robust regression models of  $\log_e$  transformed testosterone (T), androstenedione (A4), and dehydroepiandrosterone (DHEA) with total  $\log_e$  (AOSI+1) and  $\log_e$  (SRS raw) adjusted for infant sex, gestational age and maternal age. Outcome measures are 12-month Autism Observation Scales in Infants (AOSI) total score and 36-month Social Responsiveness Scale (SRS) total raw score.

\*\*Interaction *P* value comes from a model including both subject sexes including covariates, hormone variable, subject sex, older affected sibling sex and older affected sibling sex\*hormone interaction.

ln= natural log transformed



Table S3. Adjusted models of androgen levels with 12- and 36-month outcomes stratified by the older affected sibling's sex.

| Androgens* | Older Affected Sibling's Sex | Outcomes                                                                              |               |      |                 |                                                                                     |              |       |                 |
|------------|------------------------------|---------------------------------------------------------------------------------------|---------------|------|-----------------|-------------------------------------------------------------------------------------|--------------|-------|-----------------|
|            |                              | 12 month AOSI<br>(Female older affected sibling=26, Male older affected sibling =149) |               |      |                 | 36 month SRS<br>(Female older affected sibling=23, Male older affected sibling=117) |              |       |                 |
|            |                              | beta                                                                                  | 95% CI        | P    | Interaction P** | beta                                                                                | 95% CI       | P     | Interaction P** |
| ln(T)      | Female                       | 0.54                                                                                  | (-0.17,1.26)  | 0.13 | 0.02            | 0.57                                                                                | (0.24,0.89)  | 0.002 | 0.004           |
|            | Male                         | 0.10                                                                                  | (-0.11, 0.32) | 0.34 |                 | -0.08                                                                               | (-0.29,0.13) | 0.33  |                 |
| ln(A4)     | Female                       | -0.03                                                                                 | (-1.65,1.59)  | 0.97 | 0.63            | 1.11                                                                                | (-0.04,2.26) | 0.06  | 0.06            |
|            | Male                         | 0.10                                                                                  | (-0.15,0.34)  | 0.41 |                 | -0.23                                                                               | (-0.48,0.02) | 0.07  |                 |
| ln(DHEA)   | Female                       | 0.10                                                                                  | (-0.44,0.65)  | 0.69 | 0.63            | 0.17                                                                                | (-0.23,0.57) | 0.39  | 0.84            |
|            | Male                         | 0.06                                                                                  | (-0.13,0.25)  | 0.53 |                 | -0.06                                                                               | (-0.26,0.14) | 0.57  |                 |

\*Robust regression models of log<sub>e</sub> transformed testosterone (T), androstenedione (A4), and dehydroepiandrosterone (DHEA) with total log<sub>e</sub> (AOSI+1) and log<sub>e</sub> (SRS raw) adjusted for infant sex, gestational age and maternal age. Outcome measures are 12-month Autism Observation Scales in Infants (AOSI) total score and 36-month Social Responsiveness Scale (SRS) total raw score.

\*\*Interaction P value comes from a model including both subject sexes including covariates, hormone variable, subject sex, older affected sibling sex and older affected sibling sex\*hormone interaction.

ln= natural log transformed
